# Supplementary material
Source: Springer Nature journal article supplement (https://www.springermedizin.de/resource/supplementary/12889_2007_1143_MOESM2_ESM.pdf/9502548)
Supplement: MOESM2 [file 9502548]

**Table 1 Summary of intervention activity**

| <b>Setting</b>            | <b>Programme activities</b>                                                                                                                                                                                                                                                                                                                                                                                                                                                                                                                     |
|---------------------------|-------------------------------------------------------------------------------------------------------------------------------------------------------------------------------------------------------------------------------------------------------------------------------------------------------------------------------------------------------------------------------------------------------------------------------------------------------------------------------------------------------------------------------------------------|
| <b>Community</b>          | <p>Provision of smoking cessation support and holistic healthcare as an alternative to practice based support</p> <p>Development and delivery of training programme for community workers in smoking cessation support</p> <p>Distribution of information regarding support available to those who want to quit</p> <p>Profile raising activities: community events, posters, local newspaper (adverts/competitions), post-card drop to every household</p>                                                                                     |
| <b>Primary care</b>       | <p>Operational and strategic input into local smoking cessation planning</p> <p>Training of health professionals in brief and in-depth intervention methods inc. motivational interviewing</p> <p>Support of smoking cessation counselling services set up through Local Health Care Co-operative</p> <p>Provision of Nicotine Replacement Therapy through a community venue</p>                                                                                                                                                                |
| <b>Schools/<br/>Youth</b> | <p>Production of a sustainable education pack suitable for use as a teaching aid in secondary schools</p> <p>Leaflet design project and competition involving first year pupils in local secondary school.</p> <p>Clear signage about no smoking policy adopted in local secondary school</p> <p>Funded community grant projects: posters, video, web-site design, alternatives to smoking/activity groups</p> <p>Development and implementation of a protocol for the provision of smoking cessation support for those aged under 16 years</p> |
| <b>Workplace</b>          | <p>Offer of health audit/support to Small and Medium Enterprises</p>                                                                                                                                                                                                                                                                                                                                                                                                                                                                            |
